# Supplementary material for: A high performance flexible two dimensional vertically aligned ZnO nanodisc based piezoelectric nanogenerator via surface passivation
Source: Royal Society of Chemistry journal article supplement (doi:10.1039/c9na00789j), 2020-01-01
Supplement: c9na00789j1.pdf [file c9na00789j1.pdf]

## Supporting Information

### High performance flexible two dimensional vertical aligned ZnO nanodiscs based piezoelectric nanogenerator via surface passivation.

Ketki Verma,<sup>a</sup> Dhiraj Kumar Bharti,<sup>a, b</sup> Simadri Badatya, Avanish Kumar Srivastava,<sup>a, b</sup> Manoj Kumar Gupta<sup>a, b, \*</sup>

<sup>a</sup>Advanced Construction Materials Division, CSIR-Advanced Materials and Processes Research Institute, <sup>b</sup>Academy of Scientific and Innovative Research (AcSIR), Bhopal, Madhya Pradesh, India-462026.

\*E-mail: mkgupta@ampri.res.in , manojampri@gmail.com .

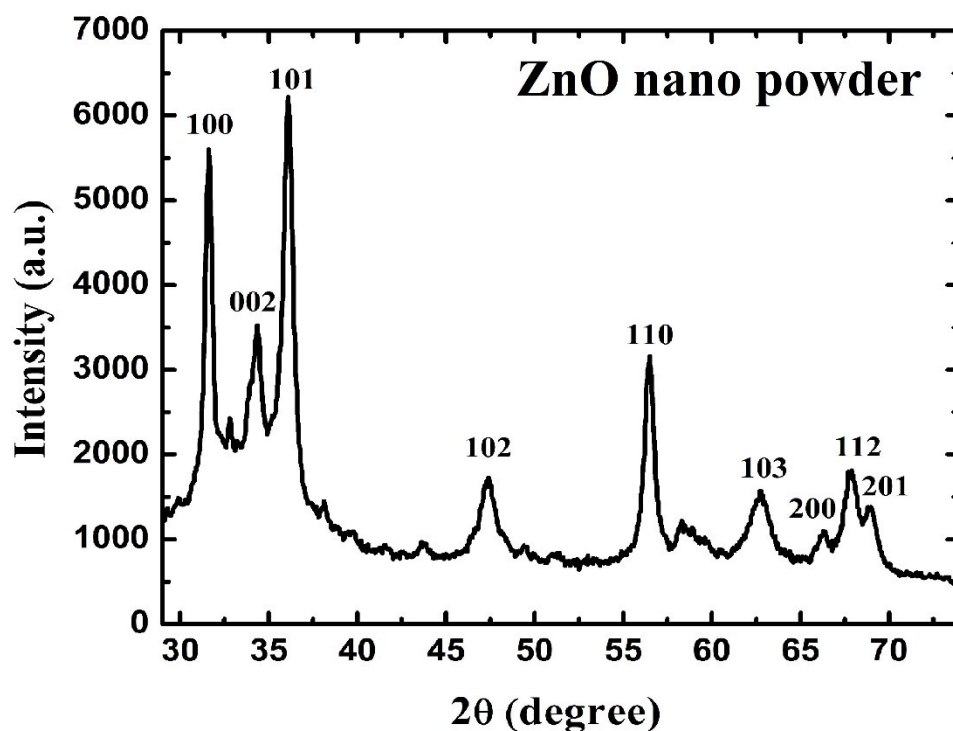

**Figure S1.** XRD spectrum of ZnO nanodiscs powder collected from ITO/PET substrate

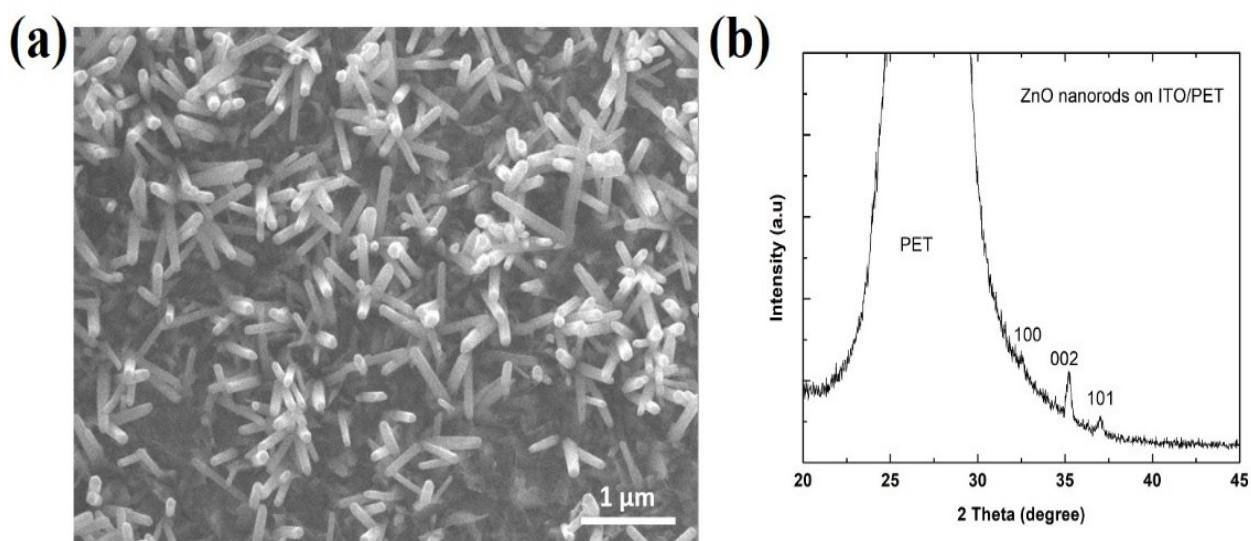

**FIG S2.** (a) FE-SEM and (b) XRD of pure ZnO nanorods grown in ITO/PET substrate (5 times seed layer coating)

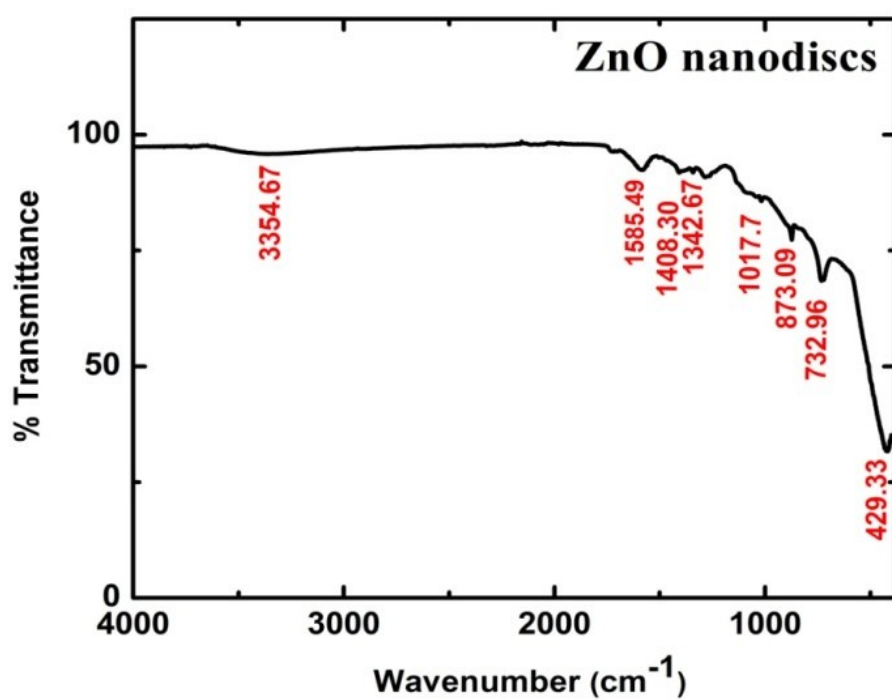

**FIG. S3** FT-IR spectra of ZnO nanodiscs on ITO/PET substrate recorded in the range of 400-4000 cm<sup>-1</sup>

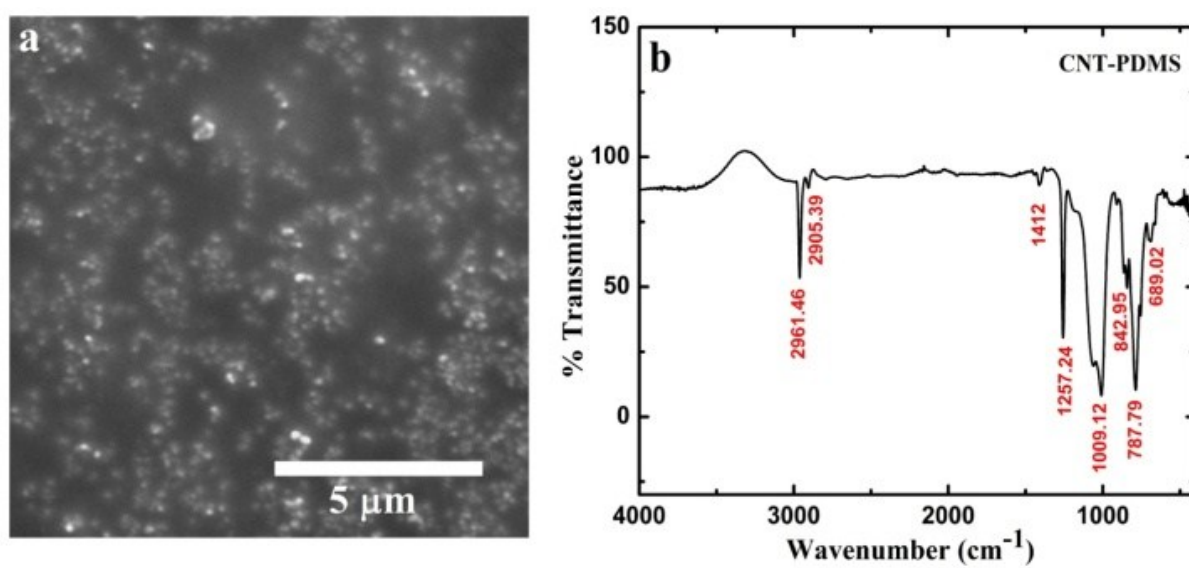

**FIG. S4** (a) FE-SEM image of CNT: PDMS composite layer, (b) FT-IR spectra of CNT: PDMS composite layer in the range of 400-4000  $\text{cm}^{-1}$ .

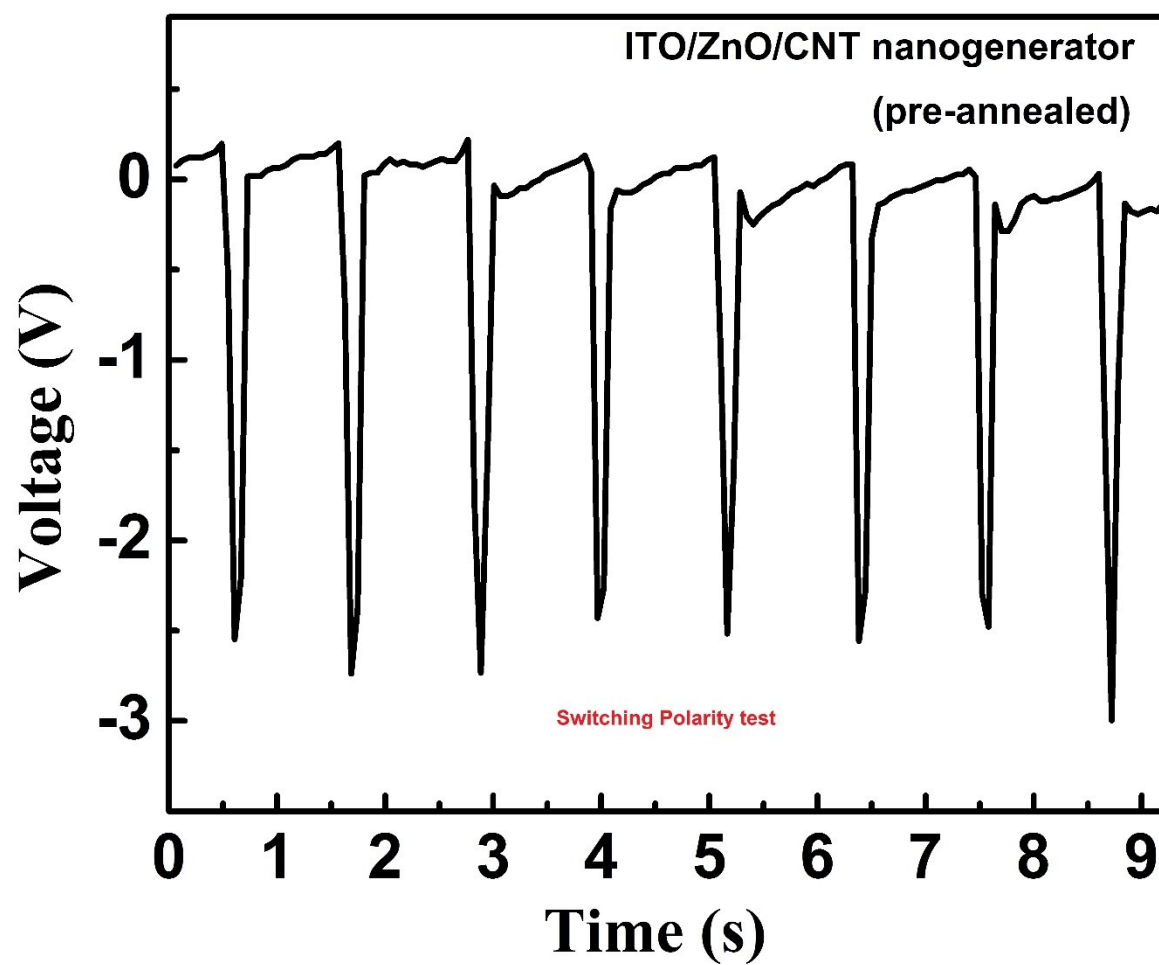

FIG. S5 Switching polarity test of 2D-ZnO nanodiscs based nanogenerator

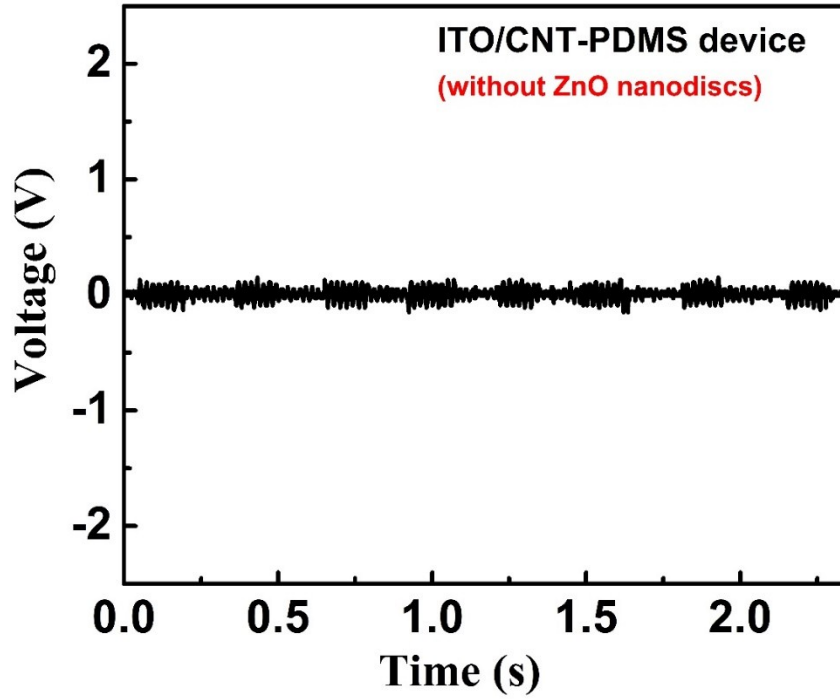

**FIG. S6.** Piezoelectric output voltage from ITO and CNT-PDMS device (without 2D-ZnO nanodiscs) based nanogenerator, showing no significant electric output

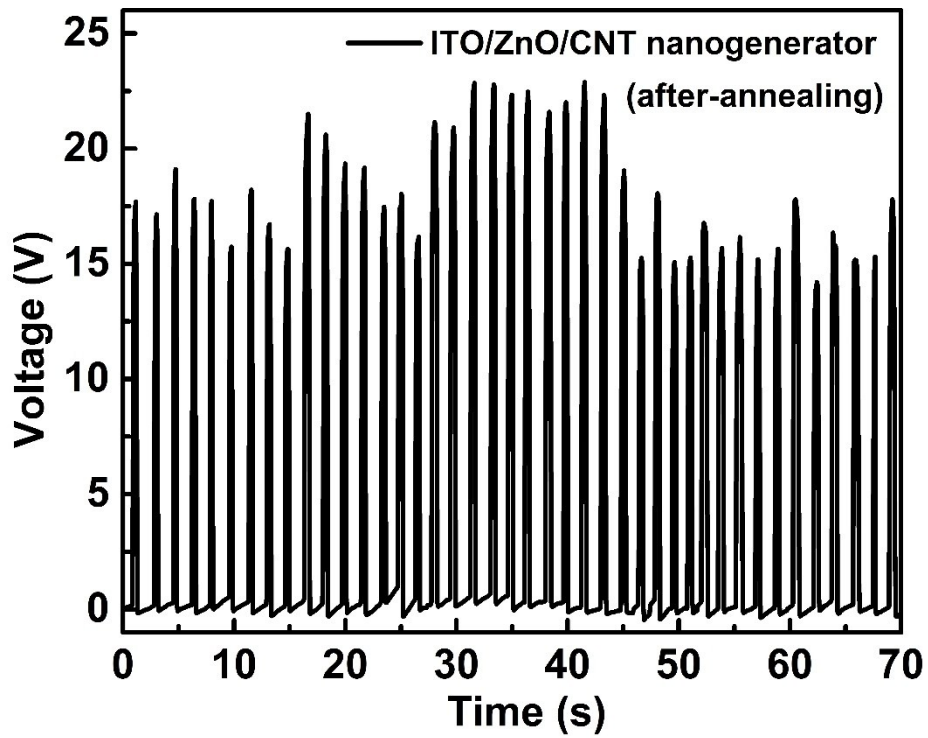

**FIG. S7.** Stability data (output voltage) of the ZnO nanodiscs based nanogenerator.
